# Supplementary material for: Preparative production of an enantiomeric pair by engineered polyketide synthases
Source: Royal Society of Chemistry journal article supplement (doi:10.1039/d1cc03073f), 2021-01-01
Supplement: d1cc03073f2.xlsx [file d1cc03073f2.xlsx]

## Sheet: Sheet1
pik127	10ul injection	ACN2-100%in15min
Triketide 1 (g/L)	Peak area(mAU*min)
0.5	7330198
0.4	6466145
0.3	5260521
0.2	3524574
0.1	1530688
0.05	827364
0.02	365408
0.01	197435
0.005	78353
