# Supplementary material for: Preparative production of an enantiomeric pair by engineered polyketide synthases
Source: Royal Society of Chemistry journal article supplement (doi:10.1039/d1cc03073f), 2021-01-01
Supplement: d1cc03073f3.xlsx [file d1cc03073f3.xlsx]

## Sheet: Sheet1
	Peak area at 247.4
Synthase	Exp. 1	Exp. 2	Exp. 3	average	SD
updated Pik167	6003081	5976010	6449183	6142758	216957
updated Pik167 (2-fold dilution)	3309101	3291051	3661290	3.42048e+06	208742
traditional Pik167	2264209	2736525	2561946	2.52089e+06	238819
updated 1-polypeptide Pik127	187583	167947	206308
traditional 1-polypeptide Pik127	ND	ND	ND
updated 2-polypeptide Pik127	3401923	3960120	3904864	3.75564e+06	307568
traditional 2-polypeptide Pik127	1228956	1219696	985369	1.14467e+06	138040
	Production (mg per L)
	Exp. 1	Exp. 2	Exp. 3	average	SD
updated Pik167 (2-fold dilution) x 2	380.575	378.499	421.08	393.385	24.0072
traditional Pik167	190.288	189.25	210.54	196.692	12.0036
updated 1-polypeptide Pik127	10.7868	9.65768	11.8636	10.7694	1.10307
traditional 1-polypeptide Pik127	ND	ND	ND
updated 2-polypeptide Pik127	195.625	227.724	224.547	215.965	17.6865
traditional 2-polypeptide Pik127	70.6703	70.1378	56.663	65.8237	7.93787
